# Supplementary material for: Crowd-sourced benchmarking of single-sample tumour subclonal reconstruction
Source: bioRxiv or medRxiv preprint supplement (doi:10.1101/2022.06.14.495937), 2022-06-15

# Supplementary Figure 1

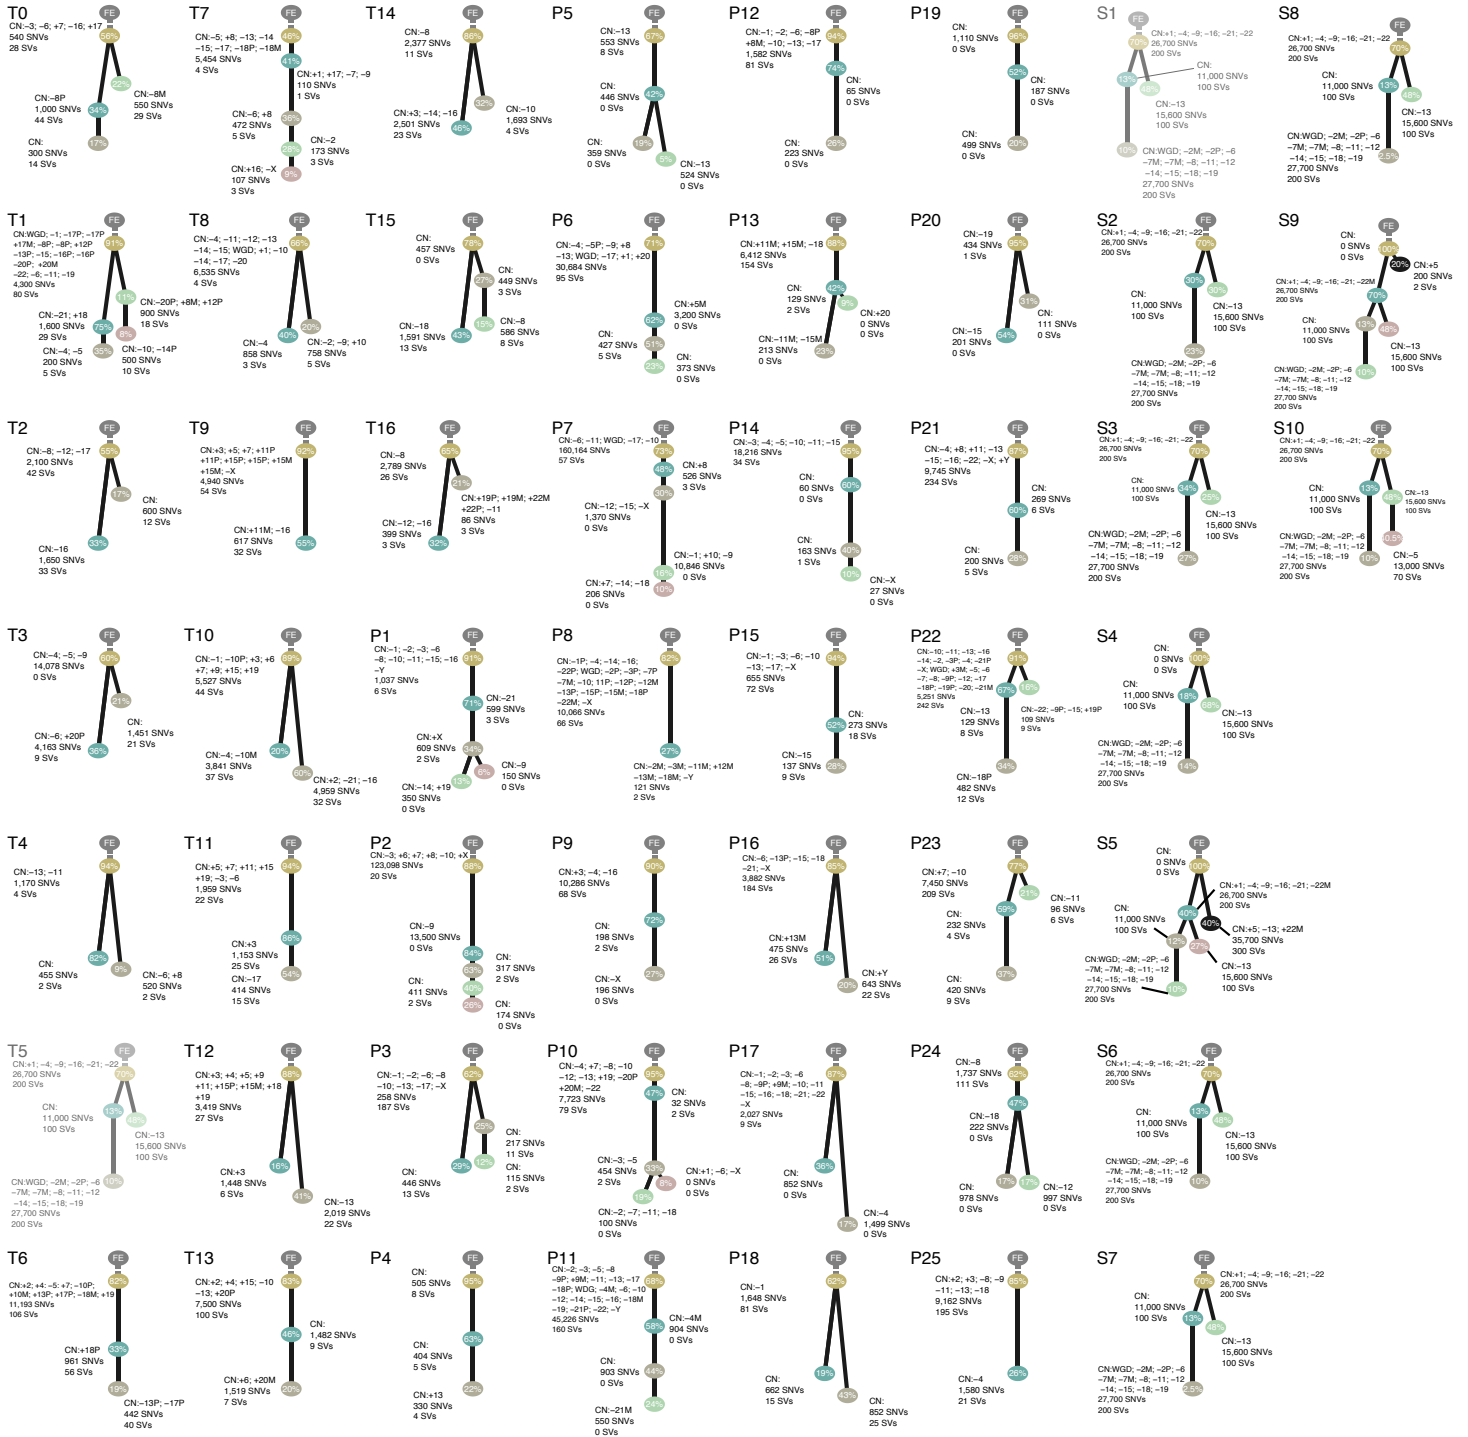

## Supplementary Figure 2

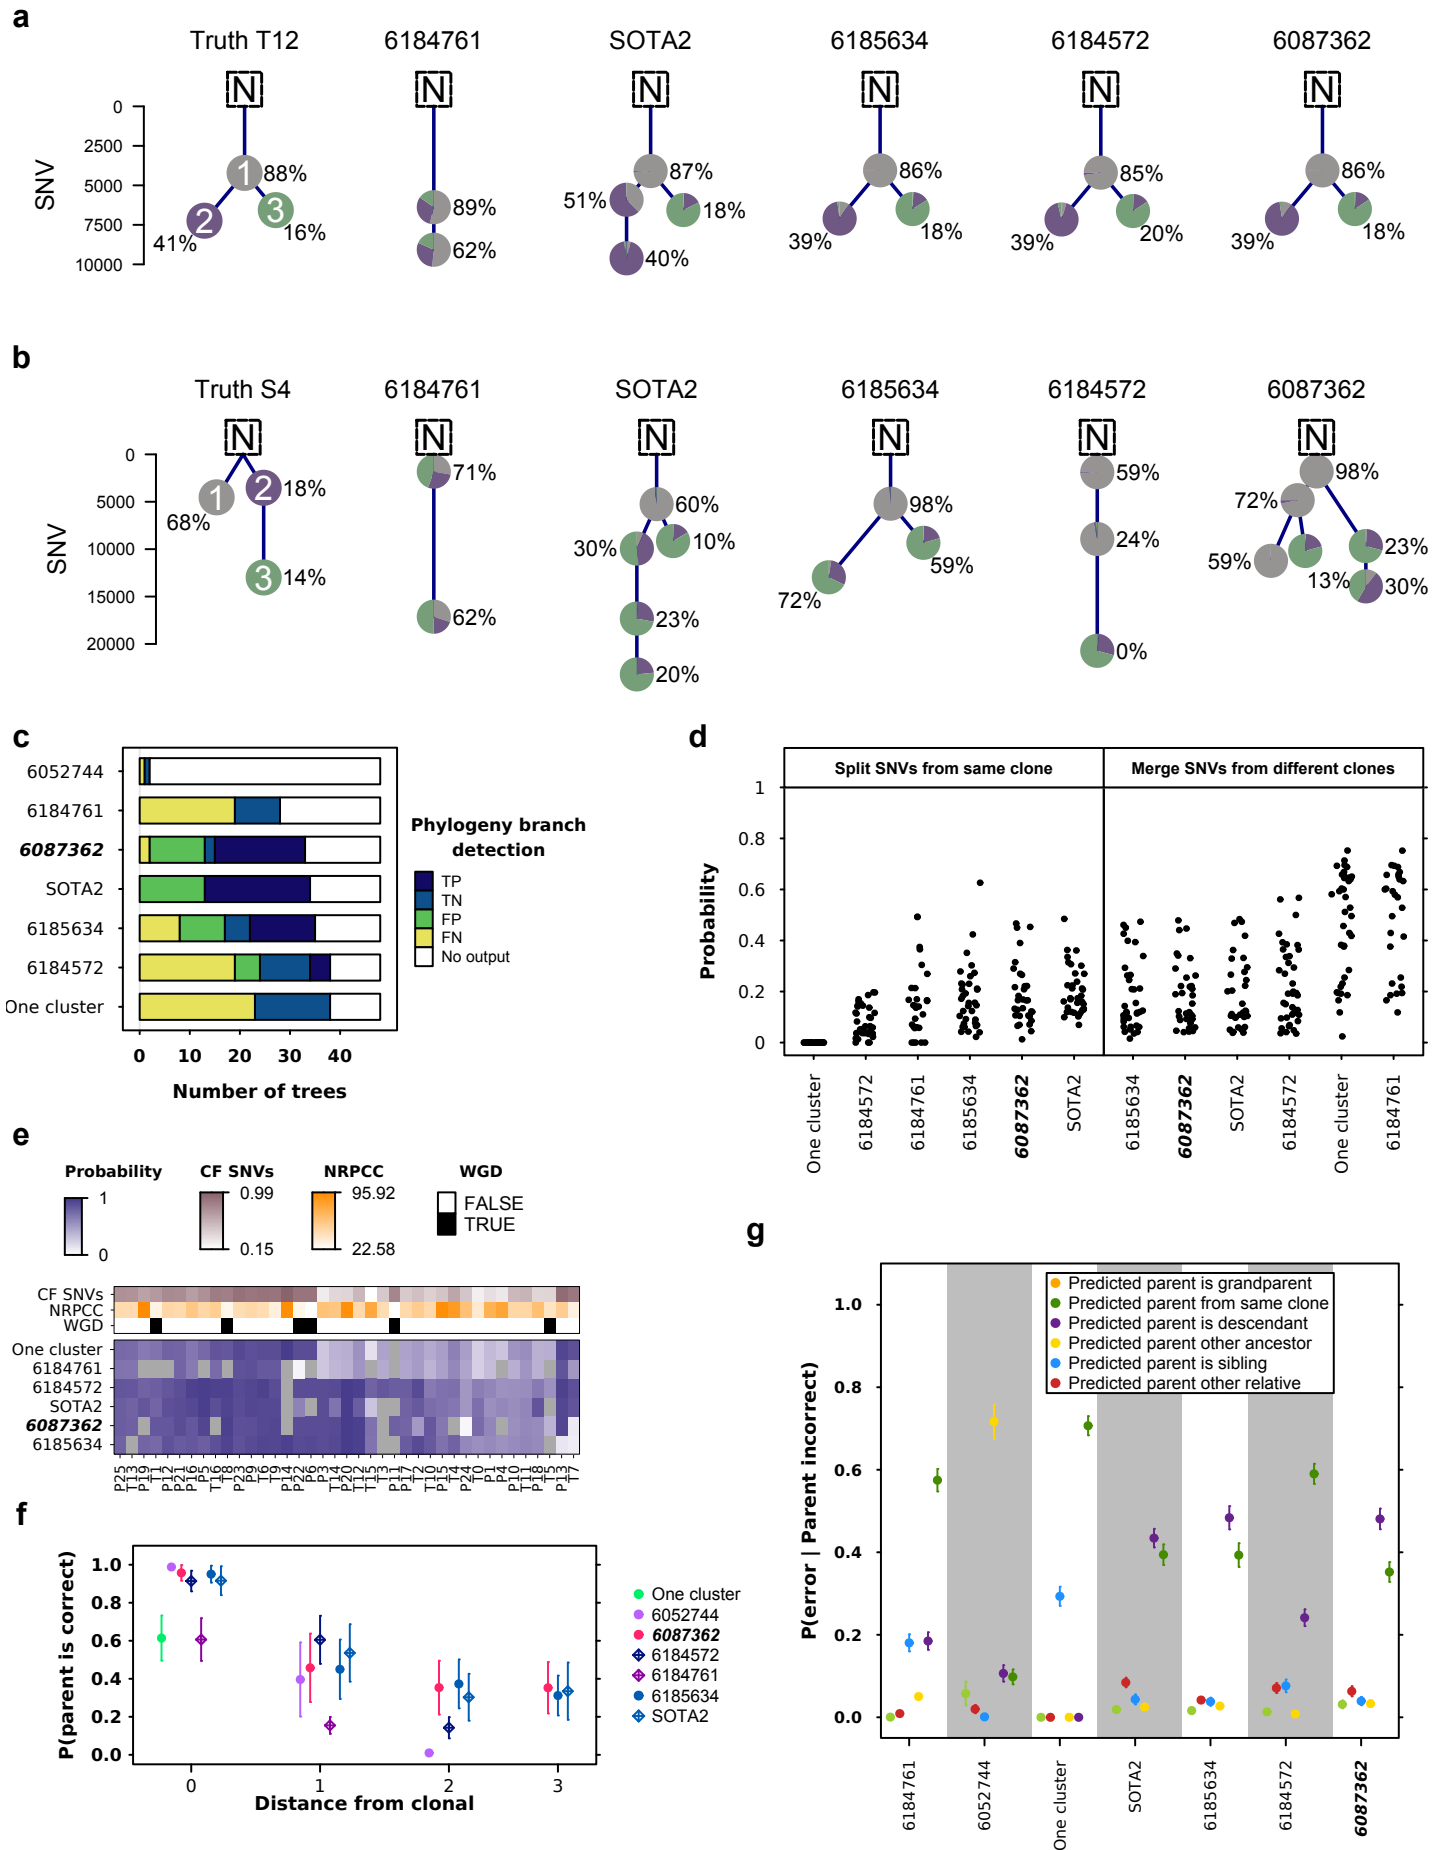

# Supplementary Figure 3

**a**

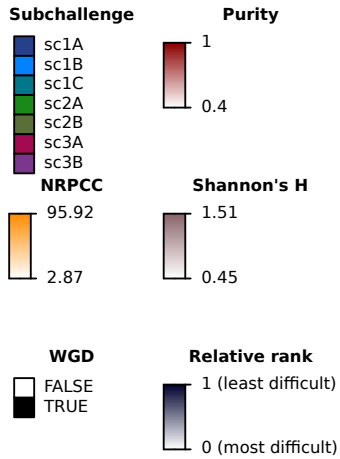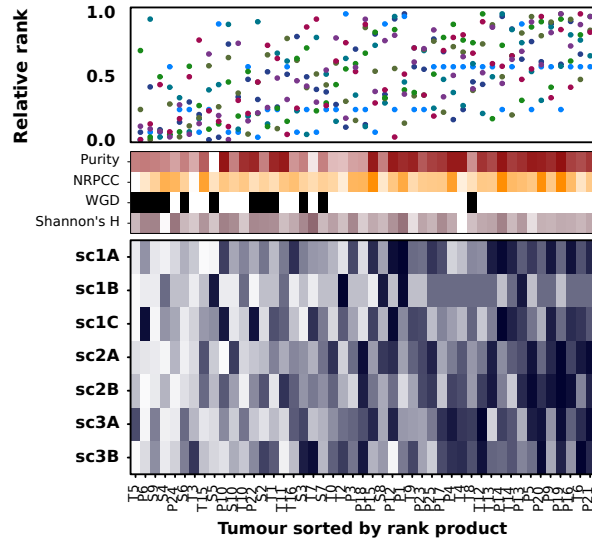

**b**

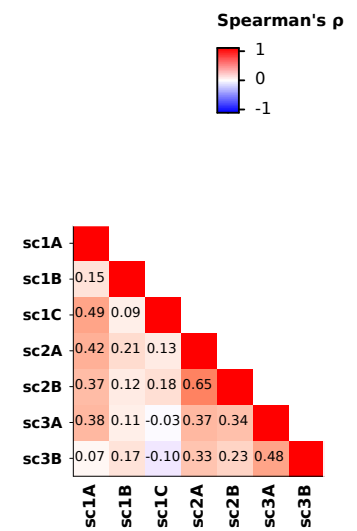

**c**

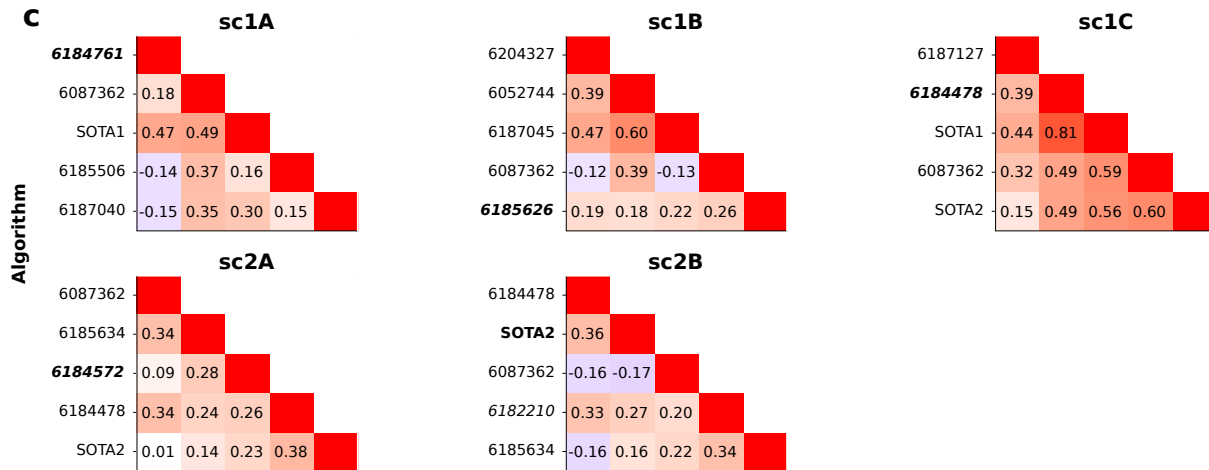

**d**

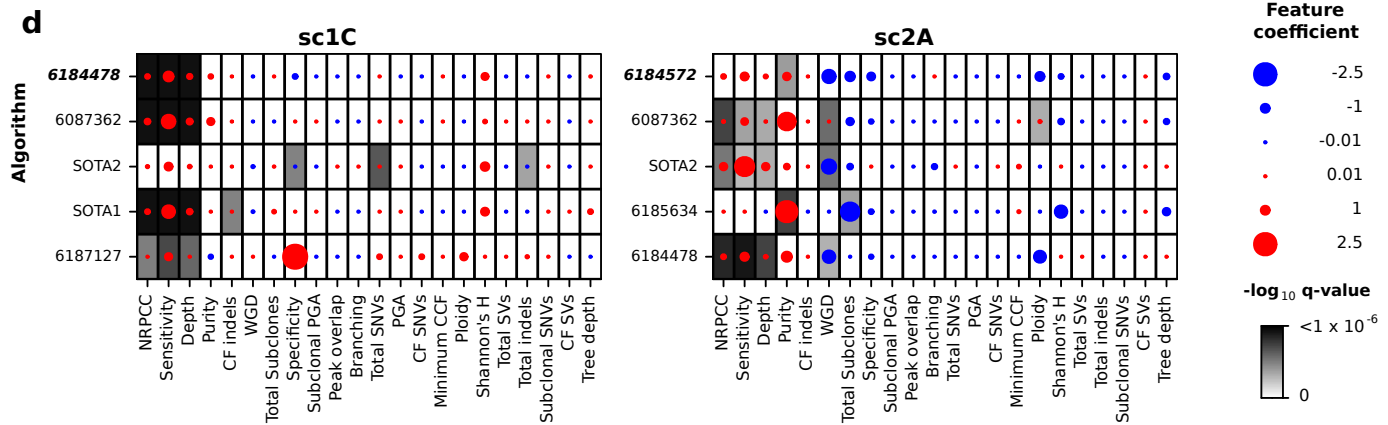

# Supplementary Figure 4

**a**

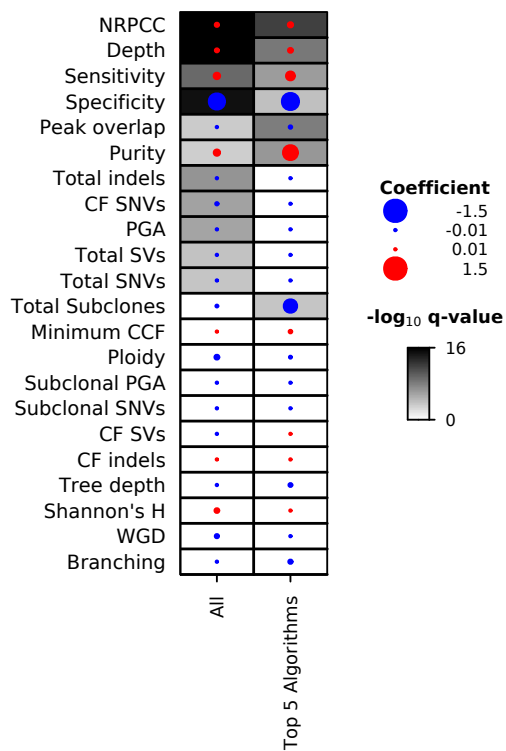

**b**

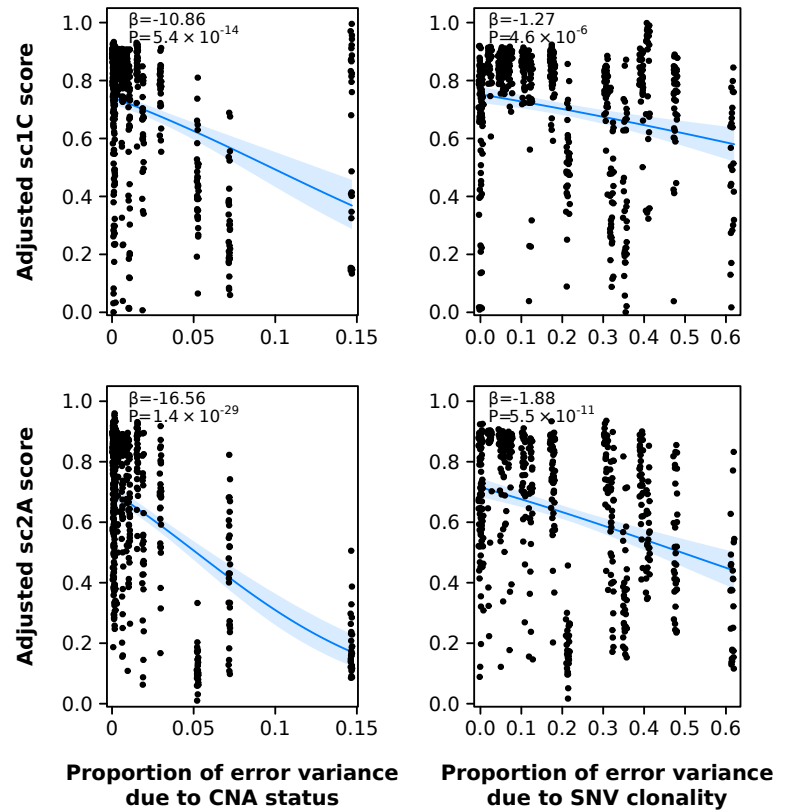

# Supplementary Figure 5

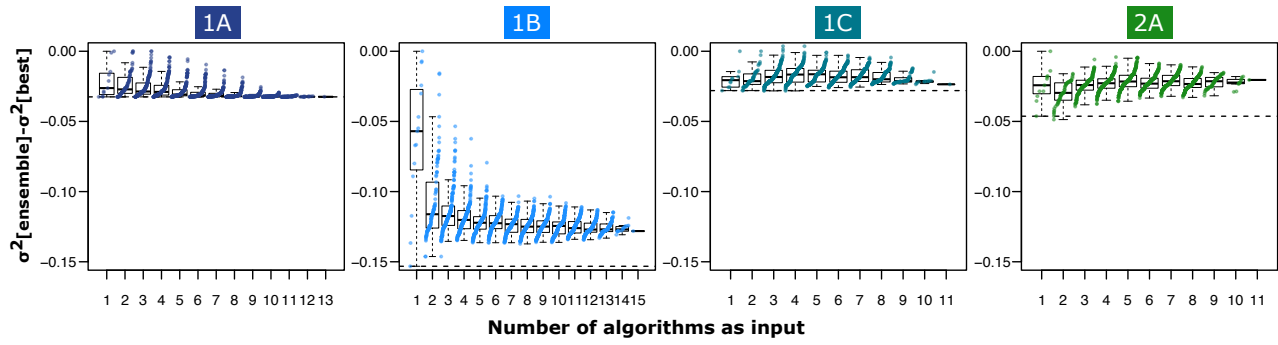

Supplement: Supplementary file [file media-1.pdf]
