# Supplementary material for: Crowd-sourced benchmarking of single-sample tumour subclonal reconstruction
Source: bioRxiv or medRxiv preprint supplement (doi:10.1101/2022.06.14.495937), 2022-06-15
Supplement: Supplementary file [file media-5.pdf]

**Supplementary Table 4: Regression results for clonal accuracy and SNV CP error.**  $\beta$  regressions were used for accuracy and a linear model was used on inverse-normal transformed errors. N=4968 and N=4462484, respectively.

|                           | Estimate Accuracy      | Std. Error Accuracy   | P-value Accuracy       | Estimate Error         | Std. Error Error      | P-value Error          |
|---------------------------|------------------------|-----------------------|------------------------|------------------------|-----------------------|------------------------|
| (Intercept)               | -2.06x10 <sup>-1</sup> | 1.48x10 <sup>-1</sup> | 1.63x10 <sup>-1</sup>  | 5.26x10 <sup>-1</sup>  | 3.81x10 <sup>-3</sup> | < 2x10 <sup>-16</sup>  |
| clonal loss               | 2.77x10 <sup>-2</sup>  | 7.59x10 <sup>-2</sup> | 7.15x10 <sup>-1</sup>  | 1.98x10 <sup>-1</sup>  | 2.50x10 <sup>-3</sup> | < 2x10 <sup>-16</sup>  |
| clonal loss*SNV clonal    | 2.60x10 <sup>-1</sup>  | 1.05x10 <sup>-1</sup> | 1.29x10 <sup>-2</sup>  | 4.50x10 <sup>-2</sup>  | 2.80x10 <sup>-3</sup> | < 2x10 <sup>-16</sup>  |
| clonal gain               | 1.21x10 <sup>-1</sup>  | 8.98x10 <sup>-2</sup> | 1.76x10 <sup>-1</sup>  | -1.53x10 <sup>-1</sup> | 1.97x10 <sup>-3</sup> | < 2x10 <sup>-16</sup>  |
| clonal gain*SNV clonal    | -5.33x10 <sup>-2</sup> | 1.21x10 <sup>-1</sup> | 6.60x10 <sup>-1</sup>  | 9.99x10 <sup>-2</sup>  | 2.06x10 <sup>-3</sup> | < 2x10 <sup>-16</sup>  |
| subclonal loss            | 6.55x10 <sup>-2</sup>  | 8.04x10 <sup>-2</sup> | 4.15x10 <sup>-1</sup>  | -2.13x10 <sup>-2</sup> | 2.36x10 <sup>-3</sup> | < 2x10 <sup>-16</sup>  |
| subclonal loss*SNV clonal | -3.29x10 <sup>-1</sup> | 1.11x10 <sup>-1</sup> | 3.06x10 <sup>-3</sup>  | -1.43x10 <sup>-1</sup> | 2.75x10 <sup>-3</sup> | < 2x10 <sup>-16</sup>  |
| subclonal gain            | -1.41x10 <sup>-1</sup> | 8.91x10 <sup>-2</sup> | 1.13x10 <sup>-1</sup>  | 2.09x10 <sup>-1</sup>  | 3.20x10 <sup>-3</sup> | < 2x10 <sup>-16</sup>  |
| subclonal gain*SNV clonal | 3.18x10 <sup>-1</sup>  | 1.20x10 <sup>-1</sup> | 7.98x10 <sup>-3</sup>  | -2.03x10 <sup>-1</sup> | 3.63x10 <sup>-3</sup> | < 2x10 <sup>-16</sup>  |
| SNV clonal                | 1.44x10 <sup>-1</sup>  | 7.28x10 <sup>-2</sup> | 4.82x10 <sup>-2</sup>  | -7.47x10 <sup>-1</sup> | 1.16x10 <sup>-3</sup> | < 2x10 <sup>-16</sup>  |
| 6052744                   | 5.68x10 <sup>-1</sup>  | 1.17x10 <sup>-1</sup> | 1.21x10 <sup>-6</sup>  | -1.50                  | 2.15x10 <sup>-3</sup> | < 2x10 <sup>-16</sup>  |
| 6087270                   | 6.59x10 <sup>-1</sup>  | 1.15x10 <sup>-1</sup> | 9.77x10 <sup>-9</sup>  | -1.37                  | 2.06x10 <sup>-3</sup> | < 2x10 <sup>-16</sup>  |
| 6087309                   | 6.92x10 <sup>-1</sup>  | 1.20x10 <sup>-1</sup> | 6.97x10 <sup>-9</sup>  | -4.88x10 <sup>-1</sup> | 2.32x10 <sup>-3</sup> | < 2x10 <sup>-16</sup>  |
| 6087362                   | 7.38x10 <sup>-1</sup>  | 1.15x10 <sup>-1</sup> | 1.40x10 <sup>-10</sup> | -1.81x10 <sup>-1</sup> | 2.05x10 <sup>-3</sup> | < 2x10 <sup>-16</sup>  |
| 6181022                   | 4.68x10 <sup>-2</sup>  | 1.16x10 <sup>-1</sup> | 6.86x10 <sup>-1</sup>  | -9.63x10 <sup>-1</sup> | 2.00x10 <sup>-3</sup> | < 2x10 <sup>-16</sup>  |
| 6184474                   | 7.20x10 <sup>-1</sup>  | 1.14x10 <sup>-1</sup> | 2.65x10 <sup>-10</sup> | -2.96x10 <sup>-1</sup> | 2.00x10 <sup>-3</sup> | < 2x10 <sup>-16</sup>  |
| 6184478                   | 7.24x10 <sup>-1</sup>  | 1.14x10 <sup>-1</sup> | 2.10x10 <sup>-10</sup> | -2.36x10 <sup>-1</sup> | 2.00x10 <sup>-3</sup> | < 2x10 <sup>-16</sup>  |
| 6184572                   | 6.73x10 <sup>-1</sup>  | 1.15x10 <sup>-1</sup> | 4.24x10 <sup>-9</sup>  | -3.03x10 <sup>-1</sup> | 2.04x10 <sup>-3</sup> | < 2x10 <sup>-16</sup>  |
| 6184761                   | 9.40x10 <sup>-3</sup>  | 1.20x10 <sup>-1</sup> | 9.38x10 <sup>-1</sup>  | 3.98x10 <sup>-1</sup>  | 2.19x10 <sup>-3</sup> | < 2x10 <sup>-16</sup>  |
| 6185634                   | 7.97x10 <sup>-1</sup>  | 1.20x10 <sup>-1</sup> | 3.02x10 <sup>-11</sup> | 5.76x10 <sup>-2</sup>  | 2.31x10 <sup>-3</sup> | < 2x10 <sup>-16</sup>  |
| 6187040                   | 7.49x10 <sup>-1</sup>  | 1.22x10 <sup>-1</sup> | 9.65x10 <sup>-10</sup> | -1.63x10 <sup>-1</sup> | 2.36x10 <sup>-3</sup> | < 2x10 <sup>-16</sup>  |
| 6187081                   | 5.56x10 <sup>-1</sup>  | 1.19x10 <sup>-1</sup> | 2.77x10 <sup>-6</sup>  | -2.16x10 <sup>-1</sup> | 2.11x10 <sup>-3</sup> | < 2x10 <sup>-16</sup>  |
| 6203106                   | 5.00x10 <sup>-1</sup>  | 1.29x10 <sup>-1</sup> | 1.06x10 <sup>-4</sup>  | -4.05x10 <sup>-1</sup> | 2.37x10 <sup>-3</sup> | < 2x10 <sup>-16</sup>  |
| 6400919                   | 5.86x10 <sup>-1</sup>  | 1.15x10 <sup>-1</sup> | 3.17x10 <sup>-7</sup>  | -4.53x10 <sup>-1</sup> | 2.00x10 <sup>-3</sup> | < 2x10 <sup>-16</sup>  |
| SOTA1                     | 6.72x10 <sup>-1</sup>  | 1.15x10 <sup>-1</sup> | 4.86x10 <sup>-9</sup>  | -7.22x10 <sup>-2</sup> | 2.06x10 <sup>-3</sup> | < 2x10 <sup>-16</sup>  |
| SOTA2                     | 7.45x10 <sup>-1</sup>  | 1.15x10 <sup>-1</sup> | 1.06x10 <sup>-10</sup> | -2.36x10 <sup>-1</sup> | 2.19x10 <sup>-3</sup> | < 2x10 <sup>-16</sup>  |
| PCAWG-IR                  | 5.55x10 <sup>-1</sup>  | 1.15x10 <sup>-1</sup> | 1.33x10 <sup>-6</sup>  | -1.15x10 <sup>-1</sup> | 2.00x10 <sup>-3</sup> | < 2x10 <sup>-16</sup>  |
| 6181088                   | 7.41x10 <sup>-1</sup>  | 1.14x10 <sup>-1</sup> | 7.48x10 <sup>-11</sup> | 6.18x10 <sup>-1</sup>  | 2.00x10 <sup>-3</sup> | < 2x10 <sup>-16</sup>  |
| 6613462                   | 8.28x10 <sup>-2</sup>  | 1.24x10 <sup>-1</sup> | 5.03x10 <sup>-1</sup>  | -6.63x10 <sup>-1</sup> | 2.11x10 <sup>-3</sup> | < 2x10 <sup>-16</sup>  |
| P10                       | -1.28x10 <sup>-1</sup> | 1.50x10 <sup>-1</sup> | 3.94x10 <sup>-1</sup>  | -1.82x10 <sup>-1</sup> | 3.98x10 <sup>-3</sup> | < 2x10 <sup>-16</sup>  |
| P11                       | -2.24x10 <sup>-1</sup> | 2.02x10 <sup>-1</sup> | 2.68x10 <sup>-1</sup>  | 5.07x10 <sup>-1</sup>  | 3.89x10 <sup>-3</sup> | < 2x10 <sup>-16</sup>  |
| P12                       | 2.35x10 <sup>-1</sup>  | 1.88x10 <sup>-1</sup> | 2.11x10 <sup>-1</sup>  | 4.37x10 <sup>-2</sup>  | 5.36x10 <sup>-3</sup> | 3.47x10 <sup>-16</sup> |
| P13                       | 4.92x10 <sup>-1</sup>  | 1.55x10 <sup>-1</sup> | 1.52x10 <sup>-3</sup>  | 2.31x10 <sup>-1</sup>  | 4.14x10 <sup>-3</sup> | < 2x10 <sup>-16</sup>  |
| P14                       | 1.75x10 <sup>-1</sup>  | 2.10x10 <sup>-1</sup> | 4.04x10 <sup>-1</sup>  | 2.76x10 <sup>-1</sup>  | 3.84x10 <sup>-3</sup> | < 2x10 <sup>-16</sup>  |
| P15                       | 3.81x10 <sup>-1</sup>  | 1.68x10 <sup>-1</sup> | 2.34x10 <sup>-2</sup>  | -6.73x10 <sup>-2</sup> | 5.97x10 <sup>-3</sup> | < 2x10 <sup>-16</sup>  |
| P16                       | 2.44x10 <sup>-1</sup>  | 1.67x10 <sup>-1</sup> | 1.43x10 <sup>-1</sup>  | 1.90x10 <sup>-1</sup>  | 3.95x10 <sup>-3</sup> | < 2x10 <sup>-16</sup>  |
| P17                       | 3.22x10 <sup>-1</sup>  | 1.64x10 <sup>-1</sup> | 4.98x10 <sup>-2</sup>  | 1.11x10 <sup>-1</sup>  | 4.26x10 <sup>-3</sup> | < 2x10 <sup>-16</sup>  |
| P18                       | 9.68x10 <sup>-3</sup>  | 1.91x10 <sup>-1</sup> | 9.59x10 <sup>-1</sup>  | 5.78x10 <sup>-2</sup>  | 4.45x10 <sup>-3</sup> | < 2x10 <sup>-16</sup>  |
| P19                       | 5.10x10 <sup>-1</sup>  | 2.59x10 <sup>-1</sup> | 4.90x10 <sup>-2</sup>  | 2.02x10 <sup>-2</sup>  | 6.09x10 <sup>-3</sup> | 9.16x10 <sup>-4</sup>  |
| P20                       | 5.62x10 <sup>-1</sup>  | 1.62x10 <sup>-1</sup> | 5.36x10 <sup>-4</sup>  | -1.26x10 <sup>-1</sup> | 6.16x10 <sup>-3</sup> | < 2x10 <sup>-16</sup>  |
| P21                       | 7.89x10 <sup>-2</sup>  | 1.69x10 <sup>-1</sup> | 6.41x10 <sup>-1</sup>  | 2.03x10 <sup>-1</sup>  | 3.90x10 <sup>-3</sup> | < 2x10 <sup>-16</sup>  |
| P22                       | -7.42x10 <sup>-4</sup> | 1.55x10 <sup>-1</sup> | 9.96x10 <sup>-1</sup>  | 1.77x10 <sup>-1</sup>  | 4.55x10 <sup>-3</sup> | < 2x10 <sup>-16</sup>  |
| P23                       | 1.25x10 <sup>-2</sup>  | 1.56x10 <sup>-1</sup> | 9.36x10 <sup>-1</sup>  | 2.30x10 <sup>-1</sup>  | 4.00x10 <sup>-3</sup> | < 2x10 <sup>-16</sup>  |
| P24                       | 1.61x10 <sup>-1</sup>  | 1.73x10 <sup>-1</sup> | 3.51x10 <sup>-1</sup>  | 1.66x10 <sup>-1</sup>  | 4.61x10 <sup>-3</sup> | < 2x10 <sup>-16</sup>  |
| P25                       | 3.69x10 <sup>-1</sup>  | 1.57x10 <sup>-1</sup> | 1.89x10 <sup>-2</sup>  | 2.40x10 <sup>-1</sup>  | 3.83x10 <sup>-3</sup> | < 2x10 <sup>-16</sup>  |
| P3                        | 3.16x10 <sup>-1</sup>  | 1.84x10 <sup>-1</sup> | 8.67x10 <sup>-2</sup>  | -7.09x10 <sup>-2</sup> | 6.28x10 <sup>-3</sup> | < 2x10 <sup>-16</sup>  |
| P4                        | 3.06x10 <sup>-1</sup>  | 1.95x10 <sup>-1</sup> | 1.16x10 <sup>-1</sup>  | -1.96x10 <sup>-1</sup> | 6.27x10 <sup>-3</sup> | < 2x10 <sup>-16</sup>  |
| P5                        | 3.98x10 <sup>-1</sup>  | 1.66x10 <sup>-1</sup> | 1.67x10 <sup>-2</sup>  | 6.49x10 <sup>-2</sup>  | 4.45x10 <sup>-3</sup> | < 2x10 <sup>-16</sup>  |
| P6                        | -1.09x10 <sup>-1</sup> | 2.20x10 <sup>-1</sup> | 6.20x10 <sup>-1</sup>  | 4.99x10 <sup>-1</sup>  | 3.88x10 <sup>-3</sup> | < 2x10 <sup>-16</sup>  |
| P8                        | 2.49x10 <sup>-1</sup>  | 1.48x10 <sup>-1</sup> | 9.29x10 <sup>-2</sup>  | 2.67x10 <sup>-1</sup>  | 4.06x10 <sup>-3</sup> | < 2x10 <sup>-16</sup>  |
| P9                        | 2.85x10 <sup>-1</sup>  | 1.68x10 <sup>-1</sup> | 8.91x10 <sup>-2</sup>  | 2.29x10 <sup>-1</sup>  | 3.88x10 <sup>-3</sup> | < 2x10 <sup>-16</sup>  |
| T0                        | -7.65x10 <sup>-2</sup> | 1.56x10 <sup>-1</sup> | 6.24x10 <sup>-1</sup>  | -1.47x10 <sup>-1</sup> | 5.00x10 <sup>-3</sup> | < 2x10 <sup>-16</sup>  |
| T1                        | 9.67x10 <sup>-3</sup>  | 1.75x10 <sup>-1</sup> | 9.56x10 <sup>-1</sup>  | -1.21x10 <sup>-2</sup> | 4.36x10 <sup>-3</sup> | 5.56x10 <sup>-3</sup>  |
| T10                       | -2.58x10 <sup>-4</sup> | 1.55x10 <sup>-1</sup> | 9.99x10 <sup>-1</sup>  | 8.30x10 <sup>-2</sup>  | 3.86x10 <sup>-3</sup> | < 2x10 <sup>-16</sup>  |
| T11                       | -8.50x10 <sup>-2</sup> | 1.48x10 <sup>-1</sup> | 5.66x10 <sup>-1</sup>  | -1.43x10 <sup>-1</sup> | 4.52x10 <sup>-3</sup> | < 2x10 <sup>-16</sup>  |
| T12                       | 2.98x10 <sup>-1</sup>  | 1.68x10 <sup>-1</sup> | 7.66x10 <sup>-2</sup>  | 1.51x10 <sup>-1</sup>  | 4.14x10 <sup>-3</sup> | < 2x10 <sup>-16</sup>  |
| T13                       | 1.36x10 <sup>-1</sup>  | 1.56x10 <sup>-1</sup> | 3.86x10 <sup>-1</sup>  | 1.93x10 <sup>-1</sup>  | 3.91x10 <sup>-3</sup> | < 2x10 <sup>-16</sup>  |
| T14                       | 1.17x10 <sup>-1</sup>  | 1.58x10 <sup>-1</sup> | 4.57x10 <sup>-1</sup>  | 7.39x10 <sup>-2</sup>  | 4.14x10 <sup>-3</sup> | < 2x10 <sup>-16</sup>  |
| T15                       | 1.78x10 <sup>-1</sup>  | 1.90x10 <sup>-1</sup> | 3.50x10 <sup>-1</sup>  | -1.44x10 <sup>-1</sup> | 4.75x10 <sup>-3</sup> | < 2x10 <sup>-16</sup>  |
| T16                       | 3.34x10 <sup>-1</sup>  | 1.54x10 <sup>-1</sup> | 3.04x10 <sup>-2</sup>  | 3.67x10 <sup>-1</sup>  | 4.66x10 <sup>-3</sup> | < 2x10 <sup>-16</sup>  |
| T2                        | -1.47x10 <sup>-1</sup> | 1.67x10 <sup>-1</sup> | 3.80x10 <sup>-1</sup>  | 2.19x10 <sup>-1</sup>  | 4.43x10 <sup>-3</sup> | < 2x10 <sup>-16</sup>  |
| T3                        | -3.53x10 <sup>-1</sup> | 1.60x10 <sup>-1</sup> | 2.68x10 <sup>-2</sup>  | 5.55x10 <sup>-1</sup>  | 3.84x10 <sup>-3</sup> | < 2x10 <sup>-16</sup>  |
| T4                        | -1.41x10 <sup>-1</sup> | 1.57x10 <sup>-1</sup> | 3.69x10 <sup>-1</sup>  | -5.23x10 <sup>-2</sup> | 5.55x10 <sup>-3</sup> | < 2x10 <sup>-16</sup>  |
| T5                        | -4.01x10 <sup>-1</sup> | 2.04x10 <sup>-1</sup> | 4.94x10 <sup>-2</sup>  | 6.76x10 <sup>-1</sup>  | 5.02x10 <sup>-3</sup> | < 2x10 <sup>-16</sup>  |
| T6                        | 9.12x10 <sup>-2</sup>  | 1.49x10 <sup>-1</sup> | 5.40x10 <sup>-1</sup>  | 2.32x10 <sup>-1</sup>  | 3.88x10 <sup>-3</sup> | < 2x10 <sup>-16</sup>  |
| T7                        | -2.23x10 <sup>-1</sup> | 1.49x10 <sup>-1</sup> | 1.34x10 <sup>-1</sup>  | 1.51x10 <sup>-1</sup>  | 4.17x10 <sup>-3</sup> | < 2x10 <sup>-16</sup>  |
| T8                        | 7.61x10 <sup>-2</sup>  | 1.57x10 <sup>-1</sup> | 6.27x10 <sup>-1</sup>  | 5.57x10 <sup>-1</sup>  | 4.21x10 <sup>-3</sup> | < 2x10 <sup>-16</sup>  |
| T9                        | 2.82x10 <sup>-2</sup>  | 1.58x10 <sup>-1</sup> | 8.58x10 <sup>-1</sup>  | -8.14x10 <sup>-3</sup> | 4.21x10 <sup>-3</sup> | 5.31x10 <sup>-2</sup>  |
| R-squared                 | 1.00x10 <sup>-1</sup>  |                       |                        | 4.10x10 <sup>-1</sup>  |                       |                        |
| Log-likelihood            | 9.63x10 <sup>+3</sup>  |                       |                        |                        |                       |                        |
| phi                       | 5.44x10 <sup>-1</sup>  | 8.78x10 <sup>-3</sup> | < 2x10 <sup>-16</sup>  |                        |                       |                        |
| F-statistic               |                        |                       |                        | 4.70x10 <sup>+4</sup>  |                       |                        |
| F-statistic DF            |                        |                       |                        | 6.70x10 <sup>+1</sup>  |                       |                        |

**Supplementary Table 5: Regression results for clonal accuracy and SNV CP error.**  $\beta$  regressions were used for accuracy and a linear model was used on inverse-normal transformed errors. N=4968 and N=4462484, respectively.

|                              | Estimate Accuracy      | Std. Error Accuracy   | P-value Accuracy       | Estimate Error         | Std. Error Error      | P-value Error          |
|------------------------------|------------------------|-----------------------|------------------------|------------------------|-----------------------|------------------------|
| (Intercept)                  | -6.24x10 <sup>-2</sup> | 1.48x10 <sup>-1</sup> | 6.72x10 <sup>-1</sup>  | -2.21x10 <sup>-1</sup> | 3.81x10 <sup>-3</sup> | < 2x10 <sup>-16</sup>  |
| clonal loss                  | 2.88x10 <sup>-1</sup>  | 7.41x10 <sup>-2</sup> | 1.03x10 <sup>-4</sup>  | 2.43x10 <sup>-1</sup>  | 1.40x10 <sup>-3</sup> | < 2x10 <sup>-16</sup>  |
| clonal loss*SNV subclonal    | -2.60x10 <sup>-1</sup> | 1.05x10 <sup>-1</sup> | 1.29x10 <sup>-2</sup>  | -4.50x10 <sup>-2</sup> | 2.80x10 <sup>-3</sup> | < 2x10 <sup>-16</sup>  |
| clonal gain                  | 6.81x10 <sup>-2</sup>  | 8.90x10 <sup>-2</sup> | 4.44x10 <sup>-1</sup>  | -5.29x10 <sup>-2</sup> | 1.40x10 <sup>-3</sup> | < 2x10 <sup>-16</sup>  |
| clonal gain*SNV subclonal    | 5.33x10 <sup>-2</sup>  | 1.21x10 <sup>-1</sup> | 6.60x10 <sup>-1</sup>  | -9.99x10 <sup>-2</sup> | 2.06x10 <sup>-3</sup> | < 2x10 <sup>-16</sup>  |
| subclonal loss               | -2.63x10 <sup>-1</sup> | 8.06x10 <sup>-2</sup> | 1.09x10 <sup>-3</sup>  | -1.64x10 <sup>-1</sup> | 1.69x10 <sup>-3</sup> | < 2x10 <sup>-16</sup>  |
| subclonal loss*SNV subclonal | 3.29x10 <sup>-1</sup>  | 1.11x10 <sup>-1</sup> | 3.06x10 <sup>-3</sup>  | 1.43x10 <sup>-1</sup>  | 2.75x10 <sup>-3</sup> | < 2x10 <sup>-16</sup>  |
| subclonal gain               | 1.77x10 <sup>-1</sup>  | 8.71x10 <sup>-2</sup> | 4.21x10 <sup>-2</sup>  | 6.24x10 <sup>-3</sup>  | 2.11x10 <sup>-3</sup> | 3.11x10 <sup>-3</sup>  |
| subclonal gain*SNV subclonal | -3.18x10 <sup>-1</sup> | 1.20x10 <sup>-1</sup> | 7.98x10 <sup>-3</sup>  | 2.03x10 <sup>-1</sup>  | 3.63x10 <sup>-3</sup> | < 2x10 <sup>-16</sup>  |
| SNV subclonal                | -1.44x10 <sup>-1</sup> | 7.28x10 <sup>-2</sup> | 4.82x10 <sup>-2</sup>  | 7.47x10 <sup>-1</sup>  | 1.16x10 <sup>-3</sup> | < 2x10 <sup>-16</sup>  |
| 6052744                      | 5.68x10 <sup>-1</sup>  | 1.17x10 <sup>-1</sup> | 1.21x10 <sup>-6</sup>  | -1.50                  | 2.15x10 <sup>-3</sup> | < 2x10 <sup>-16</sup>  |
| 6087270                      | 6.59x10 <sup>-1</sup>  | 1.15x10 <sup>-1</sup> | 9.77x10 <sup>-9</sup>  | -1.37                  | 2.06x10 <sup>-3</sup> | < 2x10 <sup>-16</sup>  |
| 6087309                      | 6.92x10 <sup>-1</sup>  | 1.20x10 <sup>-1</sup> | 6.97x10 <sup>-9</sup>  | -4.88x10 <sup>-1</sup> | 2.32x10 <sup>-3</sup> | < 2x10 <sup>-16</sup>  |
| 6087362                      | 7.38x10 <sup>-1</sup>  | 1.15x10 <sup>-1</sup> | 1.40x10 <sup>-10</sup> | -1.81x10 <sup>-1</sup> | 2.05x10 <sup>-3</sup> | < 2x10 <sup>-16</sup>  |
| 6181022                      | 4.68x10 <sup>-2</sup>  | 1.16x10 <sup>-1</sup> | 6.86x10 <sup>-1</sup>  | -9.63x10 <sup>-1</sup> | 2.00x10 <sup>-3</sup> | < 2x10 <sup>-16</sup>  |
| 6184474                      | 7.20x10 <sup>-1</sup>  | 1.14x10 <sup>-1</sup> | 2.65x10 <sup>-10</sup> | -2.96x10 <sup>-1</sup> | 2.00x10 <sup>-3</sup> | < 2x10 <sup>-16</sup>  |
| 6184478                      | 7.24x10 <sup>-1</sup>  | 1.14x10 <sup>-1</sup> | 2.10x10 <sup>-10</sup> | -2.36x10 <sup>-1</sup> | 2.00x10 <sup>-3</sup> | < 2x10 <sup>-16</sup>  |
| 6184572                      | 6.73x10 <sup>-1</sup>  | 1.15x10 <sup>-1</sup> | 4.24x10 <sup>-9</sup>  | -3.03x10 <sup>-1</sup> | 2.04x10 <sup>-3</sup> | < 2x10 <sup>-16</sup>  |
| 6184761                      | 9.40x10 <sup>-3</sup>  | 1.20x10 <sup>-1</sup> | 9.38x10 <sup>-1</sup>  | 3.98x10 <sup>-1</sup>  | 2.19x10 <sup>-3</sup> | < 2x10 <sup>-16</sup>  |
| 6185634                      | 7.97x10 <sup>-1</sup>  | 1.20x10 <sup>-1</sup> | 3.02x10 <sup>-11</sup> | 5.76x10 <sup>-2</sup>  | 2.31x10 <sup>-3</sup> | < 2x10 <sup>-16</sup>  |
| 6187040                      | 7.49x10 <sup>-1</sup>  | 1.22x10 <sup>-1</sup> | 9.65x10 <sup>-10</sup> | -1.63x10 <sup>-1</sup> | 2.36x10 <sup>-3</sup> | < 2x10 <sup>-16</sup>  |
| 6187081                      | 5.56x10 <sup>-1</sup>  | 1.19x10 <sup>-1</sup> | 2.77x10 <sup>-6</sup>  | -2.16x10 <sup>-1</sup> | 2.11x10 <sup>-3</sup> | < 2x10 <sup>-16</sup>  |
| 6203106                      | 5.00x10 <sup>-1</sup>  | 1.29x10 <sup>-1</sup> | 1.06x10 <sup>-4</sup>  | -4.05x10 <sup>-1</sup> | 2.37x10 <sup>-3</sup> | < 2x10 <sup>-16</sup>  |
| 6400919                      | 5.86x10 <sup>-1</sup>  | 1.15x10 <sup>-1</sup> | 3.17x10 <sup>-7</sup>  | -4.53x10 <sup>-1</sup> | 2.00x10 <sup>-3</sup> | < 2x10 <sup>-16</sup>  |
| SOTA1                        | 6.72x10 <sup>-1</sup>  | 1.15x10 <sup>-1</sup> | 4.86x10 <sup>-9</sup>  | -7.22x10 <sup>-2</sup> | 2.06x10 <sup>-3</sup> | < 2x10 <sup>-16</sup>  |
| SOTA2                        | 7.45x10 <sup>-1</sup>  | 1.15x10 <sup>-1</sup> | 1.06x10 <sup>-10</sup> | -2.36x10 <sup>-1</sup> | 2.19x10 <sup>-3</sup> | < 2x10 <sup>-16</sup>  |
| PCAWG-IR                     | 5.55x10 <sup>-1</sup>  | 1.15x10 <sup>-1</sup> | 1.33x10 <sup>-6</sup>  | -1.15x10 <sup>-1</sup> | 2.00x10 <sup>-3</sup> | < 2x10 <sup>-16</sup>  |
| 6181088                      | 7.41x10 <sup>-1</sup>  | 1.14x10 <sup>-1</sup> | 7.48x10 <sup>-11</sup> | 6.18x10 <sup>-1</sup>  | 2.00x10 <sup>-3</sup> | < 2x10 <sup>-16</sup>  |
| 6613462                      | 8.28x10 <sup>-2</sup>  | 1.24x10 <sup>-1</sup> | 5.03x10 <sup>-1</sup>  | -6.63x10 <sup>-1</sup> | 2.11x10 <sup>-3</sup> | < 2x10 <sup>-16</sup>  |
| P10                          | -1.28x10 <sup>-1</sup> | 1.50x10 <sup>-1</sup> | 3.94x10 <sup>-1</sup>  | -1.82x10 <sup>-1</sup> | 3.98x10 <sup>-3</sup> | < 2x10 <sup>-16</sup>  |
| P11                          | -2.24x10 <sup>-1</sup> | 2.02x10 <sup>-1</sup> | 2.68x10 <sup>-1</sup>  | 5.07x10 <sup>-1</sup>  | 3.89x10 <sup>-3</sup> | < 2x10 <sup>-16</sup>  |
| P12                          | 2.35x10 <sup>-1</sup>  | 1.88x10 <sup>-1</sup> | 2.11x10 <sup>-1</sup>  | 4.37x10 <sup>-2</sup>  | 5.36x10 <sup>-3</sup> | 3.47x10 <sup>-16</sup> |
| P13                          | 4.92x10 <sup>-1</sup>  | 1.55x10 <sup>-1</sup> | 1.52x10 <sup>-3</sup>  | 2.31x10 <sup>-1</sup>  | 4.14x10 <sup>-3</sup> | < 2x10 <sup>-16</sup>  |
| P14                          | 1.75x10 <sup>-1</sup>  | 2.10x10 <sup>-1</sup> | 4.04x10 <sup>-1</sup>  | 2.76x10 <sup>-1</sup>  | 3.84x10 <sup>-3</sup> | < 2x10 <sup>-16</sup>  |
| P15                          | 3.81x10 <sup>-1</sup>  | 1.68x10 <sup>-1</sup> | 2.34x10 <sup>-2</sup>  | -6.73x10 <sup>-2</sup> | 5.97x10 <sup>-3</sup> | < 2x10 <sup>-16</sup>  |
| P16                          | 2.44x10 <sup>-1</sup>  | 1.67x10 <sup>-1</sup> | 1.43x10 <sup>-1</sup>  | 1.90x10 <sup>-1</sup>  | 3.95x10 <sup>-3</sup> | < 2x10 <sup>-16</sup>  |
| P17                          | 3.22x10 <sup>-1</sup>  | 1.64x10 <sup>-1</sup> | 4.98x10 <sup>-2</sup>  | 1.11x10 <sup>-1</sup>  | 4.26x10 <sup>-3</sup> | < 2x10 <sup>-16</sup>  |
| P18                          | 9.68x10 <sup>-3</sup>  | 1.91x10 <sup>-1</sup> | 9.59x10 <sup>-1</sup>  | 5.78x10 <sup>-2</sup>  | 4.45x10 <sup>-3</sup> | < 2x10 <sup>-16</sup>  |
| P19                          | 5.10x10 <sup>-1</sup>  | 2.59x10 <sup>-1</sup> | 4.90x10 <sup>-2</sup>  | 2.02x10 <sup>-2</sup>  | 6.09x10 <sup>-3</sup> | 9.16x10 <sup>-4</sup>  |
| P20                          | 5.62x10 <sup>-1</sup>  | 1.62x10 <sup>-1</sup> | 5.36x10 <sup>-4</sup>  | -1.26x10 <sup>-1</sup> | 6.16x10 <sup>-3</sup> | < 2x10 <sup>-16</sup>  |
| P21                          | 7.89x10 <sup>-2</sup>  | 1.69x10 <sup>-1</sup> | 6.41x10 <sup>-1</sup>  | 2.03x10 <sup>-1</sup>  | 3.90x10 <sup>-3</sup> | < 2x10 <sup>-16</sup>  |
| P22                          | -7.42x10 <sup>-4</sup> | 1.55x10 <sup>-1</sup> | 9.96x10 <sup>-1</sup>  | 1.77x10 <sup>-1</sup>  | 4.55x10 <sup>-3</sup> | < 2x10 <sup>-16</sup>  |
| P23                          | 1.25x10 <sup>-2</sup>  | 1.56x10 <sup>-1</sup> | 9.36x10 <sup>-1</sup>  | 2.30x10 <sup>-1</sup>  | 4.00x10 <sup>-3</sup> | < 2x10 <sup>-16</sup>  |
| P24                          | 1.61x10 <sup>-1</sup>  | 1.73x10 <sup>-1</sup> | 3.51x10 <sup>-1</sup>  | 1.66x10 <sup>-1</sup>  | 4.61x10 <sup>-3</sup> | < 2x10 <sup>-16</sup>  |
| P25                          | 3.69x10 <sup>-1</sup>  | 1.57x10 <sup>-1</sup> | 1.89x10 <sup>-2</sup>  | 2.40x10 <sup>-1</sup>  | 3.83x10 <sup>-3</sup> | < 2x10 <sup>-16</sup>  |
| P3                           | 3.16x10 <sup>-1</sup>  | 1.84x10 <sup>-1</sup> | 8.67x10 <sup>-2</sup>  | -7.09x10 <sup>-2</sup> | 6.28x10 <sup>-3</sup> | < 2x10 <sup>-16</sup>  |
| P4                           | 3.06x10 <sup>-1</sup>  | 1.95x10 <sup>-1</sup> | 1.16x10 <sup>-1</sup>  | -1.96x10 <sup>-1</sup> | 6.27x10 <sup>-3</sup> | < 2x10 <sup>-16</sup>  |
| P5                           | 3.98x10 <sup>-1</sup>  | 1.66x10 <sup>-1</sup> | 1.67x10 <sup>-2</sup>  | 6.49x10 <sup>-2</sup>  | 4.45x10 <sup>-3</sup> | < 2x10 <sup>-16</sup>  |
| P6                           | -1.09x10 <sup>-1</sup> | 2.20x10 <sup>-1</sup> | 6.20x10 <sup>-1</sup>  | 4.99x10 <sup>-1</sup>  | 3.88x10 <sup>-3</sup> | < 2x10 <sup>-16</sup>  |
| P8                           | 2.49x10 <sup>-1</sup>  | 1.48x10 <sup>-1</sup> | 9.29x10 <sup>-2</sup>  | 2.67x10 <sup>-1</sup>  | 4.06x10 <sup>-3</sup> | < 2x10 <sup>-16</sup>  |
| P9                           | 2.85x10 <sup>-1</sup>  | 1.68x10 <sup>-1</sup> | 8.91x10 <sup>-2</sup>  | 2.29x10 <sup>-1</sup>  | 3.88x10 <sup>-3</sup> | < 2x10 <sup>-16</sup>  |
| T0                           | -7.65x10 <sup>-2</sup> | 1.56x10 <sup>-1</sup> | 6.24x10 <sup>-1</sup>  | -1.47x10 <sup>-1</sup> | 5.00x10 <sup>-3</sup> | < 2x10 <sup>-16</sup>  |
| T1                           | 9.67x10 <sup>-3</sup>  | 1.75x10 <sup>-1</sup> | 9.56x10 <sup>-1</sup>  | -1.21x10 <sup>-2</sup> | 4.36x10 <sup>-3</sup> | 5.56x10 <sup>-3</sup>  |
| T10                          | -2.58x10 <sup>-4</sup> | 1.55x10 <sup>-1</sup> | 9.99x10 <sup>-1</sup>  | 8.30x10 <sup>-2</sup>  | 3.86x10 <sup>-3</sup> | < 2x10 <sup>-16</sup>  |
| T11                          | -8.50x10 <sup>-2</sup> | 1.48x10 <sup>-1</sup> | 5.66x10 <sup>-1</sup>  | -1.43x10 <sup>-1</sup> | 4.52x10 <sup>-3</sup> | < 2x10 <sup>-16</sup>  |
| T12                          | 2.98x10 <sup>-1</sup>  | 1.68x10 <sup>-1</sup> | 7.66x10 <sup>-2</sup>  | 1.51x10 <sup>-1</sup>  | 4.14x10 <sup>-3</sup> | < 2x10 <sup>-16</sup>  |
| T13                          | 1.36x10 <sup>-1</sup>  | 1.56x10 <sup>-1</sup> | 3.86x10 <sup>-1</sup>  | 1.93x10 <sup>-1</sup>  | 3.91x10 <sup>-3</sup> | < 2x10 <sup>-16</sup>  |
| T14                          | 1.17x10 <sup>-1</sup>  | 1.58x10 <sup>-1</sup> | 4.57x10 <sup>-1</sup>  | 7.39x10 <sup>-2</sup>  | 4.14x10 <sup>-3</sup> | < 2x10 <sup>-16</sup>  |
| T15                          | 1.78x10 <sup>-1</sup>  | 1.90x10 <sup>-1</sup> | 3.50x10 <sup>-1</sup>  | -1.44x10 <sup>-1</sup> | 4.75x10 <sup>-3</sup> | < 2x10 <sup>-16</sup>  |
| T16                          | 3.34x10 <sup>-1</sup>  | 1.54x10 <sup>-1</sup> | 3.04x10 <sup>-2</sup>  | 3.67x10 <sup>-1</sup>  | 4.66x10 <sup>-3</sup> | < 2x10 <sup>-16</sup>  |
| T2                           | -1.47x10 <sup>-1</sup> | 1.67x10 <sup>-1</sup> | 3.80x10 <sup>-1</sup>  | 2.19x10 <sup>-1</sup>  | 4.43x10 <sup>-3</sup> | < 2x10 <sup>-16</sup>  |
| T3                           | -3.53x10 <sup>-1</sup> | 1.60x10 <sup>-1</sup> | 2.68x10 <sup>-2</sup>  | 5.55x10 <sup>-1</sup>  | 3.84x10 <sup>-3</sup> | < 2x10 <sup>-16</sup>  |
| T4                           | -1.41x10 <sup>-1</sup> | 1.57x10 <sup>-1</sup> | 3.69x10 <sup>-1</sup>  | -5.23x10 <sup>-2</sup> | 5.55x10 <sup>-3</sup> | < 2x10 <sup>-16</sup>  |
| T5                           | -4.01x10 <sup>-1</sup> | 2.04x10 <sup>-1</sup> | 4.94x10 <sup>-2</sup>  | 6.76x10 <sup>-1</sup>  | 5.02x10 <sup>-3</sup> | < 2x10 <sup>-16</sup>  |
| T6                           | 9.12x10 <sup>-2</sup>  | 1.49x10 <sup>-1</sup> | 5.40x10 <sup>-1</sup>  | 2.32x10 <sup>-1</sup>  | 3.88x10 <sup>-3</sup> | < 2x10 <sup>-16</sup>  |
| T7                           | -2.23x10 <sup>-1</sup> | 1.49x10 <sup>-1</sup> | 1.34x10 <sup>-1</sup>  | 1.51x10 <sup>-1</sup>  | 4.17x10 <sup>-3</sup> | < 2x10 <sup>-16</sup>  |
| T8                           | 7.61x10 <sup>-2</sup>  | 1.57x10 <sup>-1</sup> | 6.27x10 <sup>-1</sup>  | 5.57x10 <sup>-1</sup>  | 4.21x10 <sup>-3</sup> | < 2x10 <sup>-16</sup>  |
| T9                           | 2.82x10 <sup>-2</sup>  | 1.58x10 <sup>-1</sup> | 8.58x10 <sup>-1</sup>  | -8.14x10 <sup>-1</sup> | 4.21x10 <sup>-3</sup> | 5.31x10 <sup>-2</sup>  |
| R-squared                    | 1.00x10 <sup>-1</sup>  |                       |                        | 4.70x10 <sup>+4</sup>  |                       |                        |
| Log-likelihood               | 9.63x10 <sup>+3</sup>  |                       |                        | 6.70x10 <sup>+1</sup>  |                       |                        |
| phi                          | 5.44x10 <sup>-1</sup>  | 8.78x10 <sup>-3</sup> | < 2x10 <sup>-16</sup>  |                        |                       |                        |
| F-statistic                  |                        |                       |                        | 4.70x10 <sup>+4</sup>  |                       |                        |
| F-statistic DF               |                        |                       |                        | 6.70x10 <sup>+1</sup>  |                       |                        |

**Supplementary Table 6: Regression results assessing the effect of Battenberg CNA accuracy clonal accuracy and SNV CP error in subclonal CNAs.**  $\beta$  regressions were used for accuracy and a linear model was used on inverse-normal transformed errors. N=5212 and N=4462484, respectively.

|                           | Estimate Accuracy      | Std. Error Accuracy   | P-value Accuracy       | Estimate Error         | Std. Error Error      | P-value Error          |
|---------------------------|------------------------|-----------------------|------------------------|------------------------|-----------------------|------------------------|
| (Intercept)               | -1.91x10 <sup>-1</sup> | 1.39x10 <sup>-1</sup> | 1.69x10 <sup>-1</sup>  | 6.77x10 <sup>-1</sup>  | 4.04x10 <sup>-3</sup> | < 2x10 <sup>-16</sup>  |
| Battenberg incorrect      | 6.02x10 <sup>-2</sup>  | 7.78x10 <sup>-2</sup> | 4.39x10 <sup>-1</sup>  | 1.12x10 <sup>-1</sup>  | 2.73x10 <sup>-3</sup> | < 2x10 <sup>-16</sup>  |
| clonal loss               | 2.75x10 <sup>-2</sup>  | 7.61x10 <sup>-2</sup> | 7.17x10 <sup>-1</sup>  | 2.12x10 <sup>-1</sup>  | 2.65x10 <sup>-3</sup> | < 2x10 <sup>-16</sup>  |
| clonal loss*SNV clonal    | 2.55x10 <sup>-1</sup>  | 1.05x10 <sup>-1</sup> | 1.49x10 <sup>-2</sup>  | 4.27x10 <sup>-2</sup>  | 2.97x10 <sup>-3</sup> | < 2x10 <sup>-16</sup>  |
| clonal gain               | 1.24x10 <sup>-1</sup>  | 9.00x10 <sup>-2</sup> | 1.69x10 <sup>-1</sup>  | -1.52x10 <sup>-1</sup> | 2.09x10 <sup>-3</sup> | < 2x10 <sup>-16</sup>  |
| clonal gain*SNV clonal    | -5.26x10 <sup>-2</sup> | 1.21x10 <sup>-1</sup> | 6.65x10 <sup>-1</sup>  | 1.01x10 <sup>-1</sup>  | 2.18x10 <sup>-3</sup> | < 2x10 <sup>-16</sup>  |
| subclonal loss            | 2.99x10 <sup>-2</sup>  | 7.87x10 <sup>-2</sup> | 7.05x10 <sup>-1</sup>  | -2.74x10 <sup>-2</sup> | 2.50x10 <sup>-3</sup> | < 2x10 <sup>-16</sup>  |
| subclonal loss*SNV clonal | -2.59x10 <sup>-1</sup> | 1.08x10 <sup>-1</sup> | 1.58x10 <sup>-2</sup>  | -1.53x10 <sup>-1</sup> | 2.92x10 <sup>-3</sup> | < 2x10 <sup>-16</sup>  |
| subclonal gain            | -2.25x10 <sup>-1</sup> | 8.85x10 <sup>-2</sup> | 1.12x10 <sup>-2</sup>  | 1.85x10 <sup>-1</sup>  | 3.58x10 <sup>-3</sup> | < 2x10 <sup>-16</sup>  |
| subclonal gain*SNV clonal | 4.56x10 <sup>-1</sup>  | 1.15x10 <sup>-1</sup> | 7.75x10 <sup>-5</sup>  | -2.33x10 <sup>-1</sup> | 3.85x10 <sup>-3</sup> | < 2x10 <sup>-16</sup>  |
| SNV clonal                | 1.40x10 <sup>-1</sup>  | 7.30x10 <sup>-2</sup> | 5.43x10 <sup>-2</sup>  | -8.00x10 <sup>-1</sup> | 1.23x10 <sup>-3</sup> | < 2x10 <sup>-16</sup>  |
| 6052744                   | 5.38x10 <sup>-1</sup>  | 1.14x10 <sup>-1</sup> | 2.53x10 <sup>-6</sup>  | -1.58                  | 2.28x10 <sup>-3</sup> | < 2x10 <sup>-16</sup>  |
| 6087270                   | 6.33x10 <sup>-1</sup>  | 1.12x10 <sup>-1</sup> | 1.71x10 <sup>-8</sup>  | -1.43                  | 2.19x10 <sup>-3</sup> | < 2x10 <sup>-16</sup>  |
| 6087309                   | 6.62x10 <sup>-1</sup>  | 1.17x10 <sup>-1</sup> | 1.53x10 <sup>-8</sup>  | -5.29x10 <sup>-1</sup> | 2.46x10 <sup>-3</sup> | < 2x10 <sup>-16</sup>  |
| 6087362                   | 7.01x10 <sup>-1</sup>  | 1.12x10 <sup>-1</sup> | 4.50x10 <sup>-10</sup> | -2.02x10 <sup>-1</sup> | 2.17x10 <sup>-3</sup> | < 2x10 <sup>-16</sup>  |
| 6181022                   | 4.25x10 <sup>-2</sup>  | 1.13x10 <sup>-1</sup> | 7.07x10 <sup>-1</sup>  | -1.01                  | 2.12x10 <sup>-3</sup> | < 2x10 <sup>-16</sup>  |
| 6184474                   | 6.81x10 <sup>-1</sup>  | 1.11x10 <sup>-1</sup> | 9.60x10 <sup>-10</sup> | -3.30x10 <sup>-1</sup> | 2.12x10 <sup>-3</sup> | < 2x10 <sup>-16</sup>  |
| 6184478                   | 6.86x10 <sup>-1</sup>  | 1.11x10 <sup>-1</sup> | 7.28x10 <sup>-10</sup> | -2.67x10 <sup>-1</sup> | 2.12x10 <sup>-3</sup> | < 2x10 <sup>-16</sup>  |
| 6184572                   | 6.33x10 <sup>-1</sup>  | 1.12x10 <sup>-1</sup> | 1.56x10 <sup>-8</sup>  | -3.36x10 <sup>-1</sup> | 2.16x10 <sup>-3</sup> | < 2x10 <sup>-16</sup>  |
| 6184761                   | -2.57x10 <sup>-4</sup> | 1.17x10 <sup>-1</sup> | 9.98x10 <sup>-1</sup>  | 4.32x10 <sup>-1</sup>  | 2.32x10 <sup>-3</sup> | < 2x10 <sup>-16</sup>  |
| 6185634                   | 7.68x10 <sup>-1</sup>  | 1.18x10 <sup>-1</sup> | 8.41x10 <sup>-11</sup> | 4.85x10 <sup>-2</sup>  | 2.44x10 <sup>-3</sup> | < 2x10 <sup>-16</sup>  |
| 6187040                   | 7.14x10 <sup>-1</sup>  | 1.20x10 <sup>-1</sup> | 2.81x10 <sup>-9</sup>  | -1.76x10 <sup>-1</sup> | 2.50x10 <sup>-3</sup> | < 2x10 <sup>-16</sup>  |
| 6187081                   | 5.25x10 <sup>-1</sup>  | 1.16x10 <sup>-1</sup> | 5.74x10 <sup>-6</sup>  | -2.41x10 <sup>-1</sup> | 2.23x10 <sup>-3</sup> | < 2x10 <sup>-16</sup>  |
| 6203106                   | 4.66x10 <sup>-1</sup>  | 1.27x10 <sup>-1</sup> | 2.42x10 <sup>-4</sup>  | -4.41x10 <sup>-1</sup> | 2.52x10 <sup>-3</sup> | < 2x10 <sup>-16</sup>  |
| 6400919                   | 5.49x10 <sup>-1</sup>  | 1.12x10 <sup>-1</sup> | 9.34x10 <sup>-7</sup>  | -4.94x10 <sup>-1</sup> | 2.12x10 <sup>-3</sup> | < 2x10 <sup>-16</sup>  |
| SOTA1                     | 6.35x10 <sup>-1</sup>  | 1.12x10 <sup>-1</sup> | 1.50x10 <sup>-8</sup>  | -8.84x10 <sup>-2</sup> | 2.19x10 <sup>-3</sup> | < 2x10 <sup>-16</sup>  |
| SOTA2                     | 7.06x10 <sup>-1</sup>  | 1.13x10 <sup>-1</sup> | 3.75x10 <sup>-10</sup> | -2.63x10 <sup>-1</sup> | 2.32x10 <sup>-3</sup> | < 2x10 <sup>-16</sup>  |
| PCAWG-IR                  | 5.28x10 <sup>-1</sup>  | 1.12x10 <sup>-1</sup> | 2.50x10 <sup>-6</sup>  | -1.32x10 <sup>-1</sup> | 2.12x10 <sup>-3</sup> | < 2x10 <sup>-16</sup>  |
| 6181088                   | 7.04x10 <sup>-1</sup>  | 1.11x10 <sup>-1</sup> | 2.47x10 <sup>-10</sup> | 6.53x10 <sup>-1</sup>  | 2.12x10 <sup>-3</sup> | < 2x10 <sup>-16</sup>  |
| 6613462                   | 8.12x10 <sup>-2</sup>  | 1.21x10 <sup>-1</sup> | 5.01x10 <sup>-1</sup>  | -7.08x10 <sup>-1</sup> | 2.23x10 <sup>-3</sup> | < 2x10 <sup>-16</sup>  |
| P10                       | -1.28x10 <sup>-1</sup> | 1.42x10 <sup>-1</sup> | 3.67x10 <sup>-1</sup>  | -1.93x10 <sup>-1</sup> | 4.22x10 <sup>-3</sup> | < 2x10 <sup>-16</sup>  |
| P11                       | -2.14x10 <sup>-1</sup> | 1.96x10 <sup>-1</sup> | 2.75x10 <sup>-1</sup>  | 5.25x10 <sup>-1</sup>  | 4.13x10 <sup>-3</sup> | < 2x10 <sup>-16</sup>  |
| P12                       | 2.39x10 <sup>-1</sup>  | 1.82x10 <sup>-1</sup> | 1.91x10 <sup>-1</sup>  | 5.19x10 <sup>-2</sup>  | 5.68x10 <sup>-3</sup> | < 2x10 <sup>-16</sup>  |
| P13                       | 5.05x10 <sup>-1</sup>  | 1.48x10 <sup>-1</sup> | 6.48x10 <sup>-4</sup>  | 2.42x10 <sup>-1</sup>  | 4.40x10 <sup>-3</sup> | < 2x10 <sup>-16</sup>  |
| P14                       | 1.78x10 <sup>-1</sup>  | 2.05x10 <sup>-1</sup> | 3.85x10 <sup>-1</sup>  | 2.94x10 <sup>-1</sup>  | 4.07x10 <sup>-3</sup> | < 2x10 <sup>-16</sup>  |
| P15                       | 3.88x10 <sup>-1</sup>  | 1.61x10 <sup>-1</sup> | 1.61x10 <sup>-2</sup>  | -6.72x10 <sup>-2</sup> | 6.33x10 <sup>-3</sup> | < 2x10 <sup>-16</sup>  |
| P16                       | 2.50x10 <sup>-1</sup>  | 1.61x10 <sup>-1</sup> | 1.20x10 <sup>-1</sup>  | 2.00x10 <sup>-1</sup>  | 4.19x10 <sup>-3</sup> | < 2x10 <sup>-16</sup>  |
| P17                       | 3.27x10 <sup>-1</sup>  | 1.57x10 <sup>-1</sup> | 3.75x10 <sup>-2</sup>  | 1.16x10 <sup>-1</sup>  | 4.52x10 <sup>-3</sup> | < 2x10 <sup>-16</sup>  |
| P18                       | 1.59x10 <sup>-2</sup>  | 1.85x10 <sup>-1</sup> | 9.31x10 <sup>-1</sup>  | 5.02x10 <sup>-2</sup>  | 4.72x10 <sup>-3</sup> | < 2x10 <sup>-16</sup>  |
| P19                       | 5.11x10 <sup>-1</sup>  | 2.55x10 <sup>-1</sup> | 4.50x10 <sup>-2</sup>  | 1.94x10 <sup>-2</sup>  | 6.46x10 <sup>-3</sup> | 2.66x10 <sup>-3</sup>  |
| P20                       | 5.66x10 <sup>-1</sup>  | 1.55x10 <sup>-1</sup> | 2.54x10 <sup>-4</sup>  | -1.27x10 <sup>-1</sup> | 6.53x10 <sup>-3</sup> | < 2x10 <sup>-16</sup>  |
| P21                       | 8.29x10 <sup>-2</sup>  | 1.63x10 <sup>-1</sup> | 6.10x10 <sup>-1</sup>  | 2.09x10 <sup>-1</sup>  | 4.13x10 <sup>-3</sup> | < 2x10 <sup>-16</sup>  |
| P22                       | -2.03x10 <sup>-2</sup> | 1.49x10 <sup>-1</sup> | 8.92x10 <sup>-1</sup>  | 1.68x10 <sup>-1</sup>  | 4.87x10 <sup>-3</sup> | < 2x10 <sup>-16</sup>  |
| P23                       | 1.86x10 <sup>-2</sup>  | 1.48x10 <sup>-1</sup> | 9.00x10 <sup>-1</sup>  | 2.34x10 <sup>-1</sup>  | 4.24x10 <sup>-3</sup> | < 2x10 <sup>-16</sup>  |
| P24                       | 1.67x10 <sup>-1</sup>  | 1.66x10 <sup>-1</sup> | 3.14x10 <sup>-1</sup>  | 1.67x10 <sup>-1</sup>  | 4.89x10 <sup>-3</sup> | < 2x10 <sup>-16</sup>  |
| P25                       | 3.74x10 <sup>-1</sup>  | 1.49x10 <sup>-1</sup> | 1.24x10 <sup>-2</sup>  | 2.52x10 <sup>-1</sup>  | 4.07x10 <sup>-3</sup> | < 2x10 <sup>-16</sup>  |
| P3                        | 3.19x10 <sup>-1</sup>  | 1.78x10 <sup>-1</sup> | 7.42x10 <sup>-2</sup>  | -8.90x10 <sup>-2</sup> | 6.65x10 <sup>-3</sup> | < 2x10 <sup>-16</sup>  |
| P4                        | 3.14x10 <sup>-1</sup>  | 1.90x10 <sup>-1</sup> | 9.73x10 <sup>-2</sup>  | -2.14x10 <sup>-1</sup> | 6.64x10 <sup>-3</sup> | < 2x10 <sup>-16</sup>  |
| P5                        | 3.99x10 <sup>-1</sup>  | 1.59x10 <sup>-1</sup> | 1.23x10 <sup>-2</sup>  | 6.34x10 <sup>-2</sup>  | 4.72x10 <sup>-3</sup> | < 2x10 <sup>-16</sup>  |
| P6                        | -1.31x10 <sup>-1</sup> | 2.16x10 <sup>-1</sup> | 5.45x10 <sup>-1</sup>  | 5.13x10 <sup>-1</sup>  | 4.12x10 <sup>-3</sup> | < 2x10 <sup>-16</sup>  |
| P8                        | 2.57x10 <sup>-1</sup>  | 1.40x10 <sup>-1</sup> | 6.73x10 <sup>-2</sup>  | 2.83x10 <sup>-1</sup>  | 4.30x10 <sup>-3</sup> | < 2x10 <sup>-16</sup>  |
| P9                        | 2.87x10 <sup>-1</sup>  | 1.61x10 <sup>-1</sup> | 7.44x10 <sup>-2</sup>  | 2.43x10 <sup>-1</sup>  | 4.11x10 <sup>-3</sup> | < 2x10 <sup>-16</sup>  |
| T0                        | -6.87x10 <sup>-2</sup> | 1.48x10 <sup>-1</sup> | 6.43x10 <sup>-1</sup>  | -1.66x10 <sup>-1</sup> | 5.30x10 <sup>-3</sup> | < 2x10 <sup>-16</sup>  |
| T1                        | 1.19x10 <sup>-2</sup>  | 1.56x10 <sup>-1</sup> | 9.39x10 <sup>-1</sup>  | -3.33x10 <sup>-2</sup> | 4.64x10 <sup>-3</sup> | 7.40x10 <sup>-13</sup> |
| T10                       | -1.79x10 <sup>-2</sup> | 1.41x10 <sup>-1</sup> | 8.99x10 <sup>-1</sup>  | 8.55x10 <sup>-2</sup>  | 4.10x10 <sup>-3</sup> | < 2x10 <sup>-16</sup>  |
| T11                       | -8.86x10 <sup>-2</sup> | 1.40x10 <sup>-1</sup> | 5.26x10 <sup>-1</sup>  | -1.61x10 <sup>-1</sup> | 4.79x10 <sup>-3</sup> | < 2x10 <sup>-16</sup>  |
| T12                       | 3.01x10 <sup>-1</sup>  | 1.61x10 <sup>-1</sup> | 6.13x10 <sup>-2</sup>  | 1.55x10 <sup>-1</sup>  | 4.39x10 <sup>-3</sup> | < 2x10 <sup>-16</sup>  |
| T13                       | 1.44x10 <sup>-1</sup>  | 1.49x10 <sup>-1</sup> | 3.33x10 <sup>-1</sup>  | 2.03x10 <sup>-1</sup>  | 4.15x10 <sup>-3</sup> | < 2x10 <sup>-16</sup>  |
| T14                       | 1.26x10 <sup>-1</sup>  | 1.51x10 <sup>-1</sup> | 4.05x10 <sup>-1</sup>  | 7.73x10 <sup>-2</sup>  | 4.39x10 <sup>-3</sup> | < 2x10 <sup>-16</sup>  |
| T15                       | 1.84x10 <sup>-1</sup>  | 1.84x10 <sup>-1</sup> | 3.17x10 <sup>-1</sup>  | -1.61x10 <sup>-1</sup> | 5.04x10 <sup>-3</sup> | < 2x10 <sup>-16</sup>  |
| T16                       | 3.29x10 <sup>-1</sup>  | 1.46x10 <sup>-1</sup> | 2.45x10 <sup>-2</sup>  | 3.79x10 <sup>-1</sup>  | 4.94x10 <sup>-3</sup> | < 2x10 <sup>-16</sup>  |
| T2                        | -1.36x10 <sup>-1</sup> | 1.60x10 <sup>-1</sup> | 3.95x10 <sup>-1</sup>  | 2.26x10 <sup>-1</sup>  | 4.69x10 <sup>-3</sup> | < 2x10 <sup>-16</sup>  |
| T3                        | -3.46x10 <sup>-1</sup> | 1.38x10 <sup>-1</sup> | 1.20x10 <sup>-2</sup>  | 5.74x10 <sup>-1</sup>  | 4.07x10 <sup>-3</sup> | < 2x10 <sup>-16</sup>  |
| T4                        | -1.28x10 <sup>-1</sup> | 1.50x10 <sup>-1</sup> | 3.95x10 <sup>-1</sup>  | -5.11x10 <sup>-2</sup> | 5.89x10 <sup>-3</sup> | < 2x10 <sup>-16</sup>  |
| T5                        | -4.02x10 <sup>-1</sup> | 1.74x10 <sup>-1</sup> | 2.07x10 <sup>-2</sup>  | 6.80x10 <sup>-1</sup>  | 5.41x10 <sup>-3</sup> | < 2x10 <sup>-16</sup>  |
| T6                        | 9.70x10 <sup>-2</sup>  | 1.41x10 <sup>-1</sup> | 4.92x10 <sup>-1</sup>  | 2.40x10 <sup>-1</sup>  | 4.11x10 <sup>-3</sup> | < 2x10 <sup>-16</sup>  |
| T7                        | -2.07x10 <sup>-1</sup> | 1.35x10 <sup>-1</sup> | 1.24x10 <sup>-1</sup>  | 1.59x10 <sup>-1</sup>  | 4.42x10 <sup>-3</sup> | < 2x10 <sup>-16</sup>  |
| T8                        | 8.55x10 <sup>-2</sup>  | 1.50x10 <sup>-1</sup> | 5.68x10 <sup>-1</sup>  | 5.83x10 <sup>-1</sup>  | 4.46x10 <sup>-3</sup> | < 2x10 <sup>-16</sup>  |
| T9                        | 3.88x10 <sup>-2</sup>  | 1.50x10 <sup>-1</sup> | 7.96x10 <sup>-1</sup>  | -1.28x10 <sup>-2</sup> | 4.46x10 <sup>-3</sup> | 4.05x10 <sup>-3</sup>  |
| R-squared                 | 1.00x10 <sup>-1</sup>  |                       |                        | 4.10x10 <sup>-1</sup>  |                       |                        |
| Log-likelihood            | 1.03x10 <sup>+4</sup>  |                       |                        |                        |                       |                        |
| phi                       | 5.30x10 <sup>-1</sup>  | 8.31x10 <sup>-3</sup> | < 2x10 <sup>-16</sup>  |                        |                       |                        |
| F-statistic               |                        |                       |                        | 4.59x10 <sup>+4</sup>  |                       |                        |
| F-statistic DF            |                        |                       |                        | 6.80x10 <sup>+1</sup>  |                       |                        |
